# Supplementary material for: A novel protease activity assay method based on an engineered autoinhibited protein using an enzyme-linked immunoassay
Source: Royal Society of Chemistry journal article supplement (doi:10.1039/c3an01336g), 2013-01-01
Supplement: c3an01336g.pdf [file c3an01336g.pdf]

## A novel protease activity assay method based on an engineered autoinhibited protein using an enzyme-linked immunoassay

Hyun Kyung Yoon<sup>a</sup> and Tae Hyeon Yoo<sup>a,b \*</sup>

<sup>a</sup>Department of Molecular Science and Technology, <sup>b</sup>Department of Applied Chemistry and Biological Engineering, Ajou University, Suwon, 443-749, Korea

\* Correspondence should be addressed to T.H.Y.

Tel: +82-31-219-3543

Fax: +82-31-219-1610

E-mail: [taehyeonyoo@ajou.ac.kr](mailto:taehyeonyoo@ajou.ac.kr)

### Supporting Information

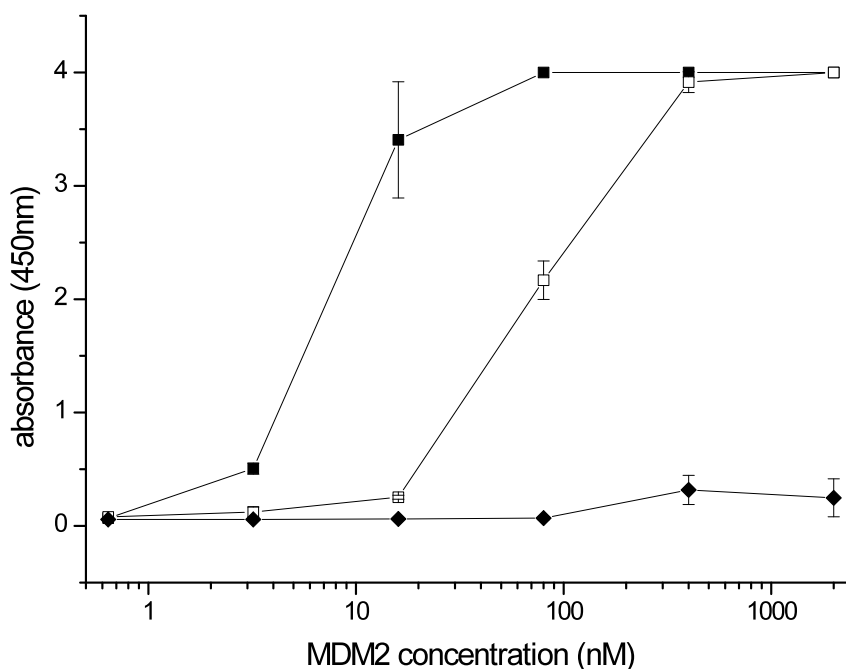

Fig. S1. Comparison of the binding affinity of GST-P27L (■), GST-PMI-N8A (□), and blank (◆) to MDM2. GST-P27L, GST-PMI-N8A, or blank (coating buffer) was coated on 96-well plates, and the binding of MDM2 was evaluated by anti-His<sub>6</sub>-HRP conjugate.

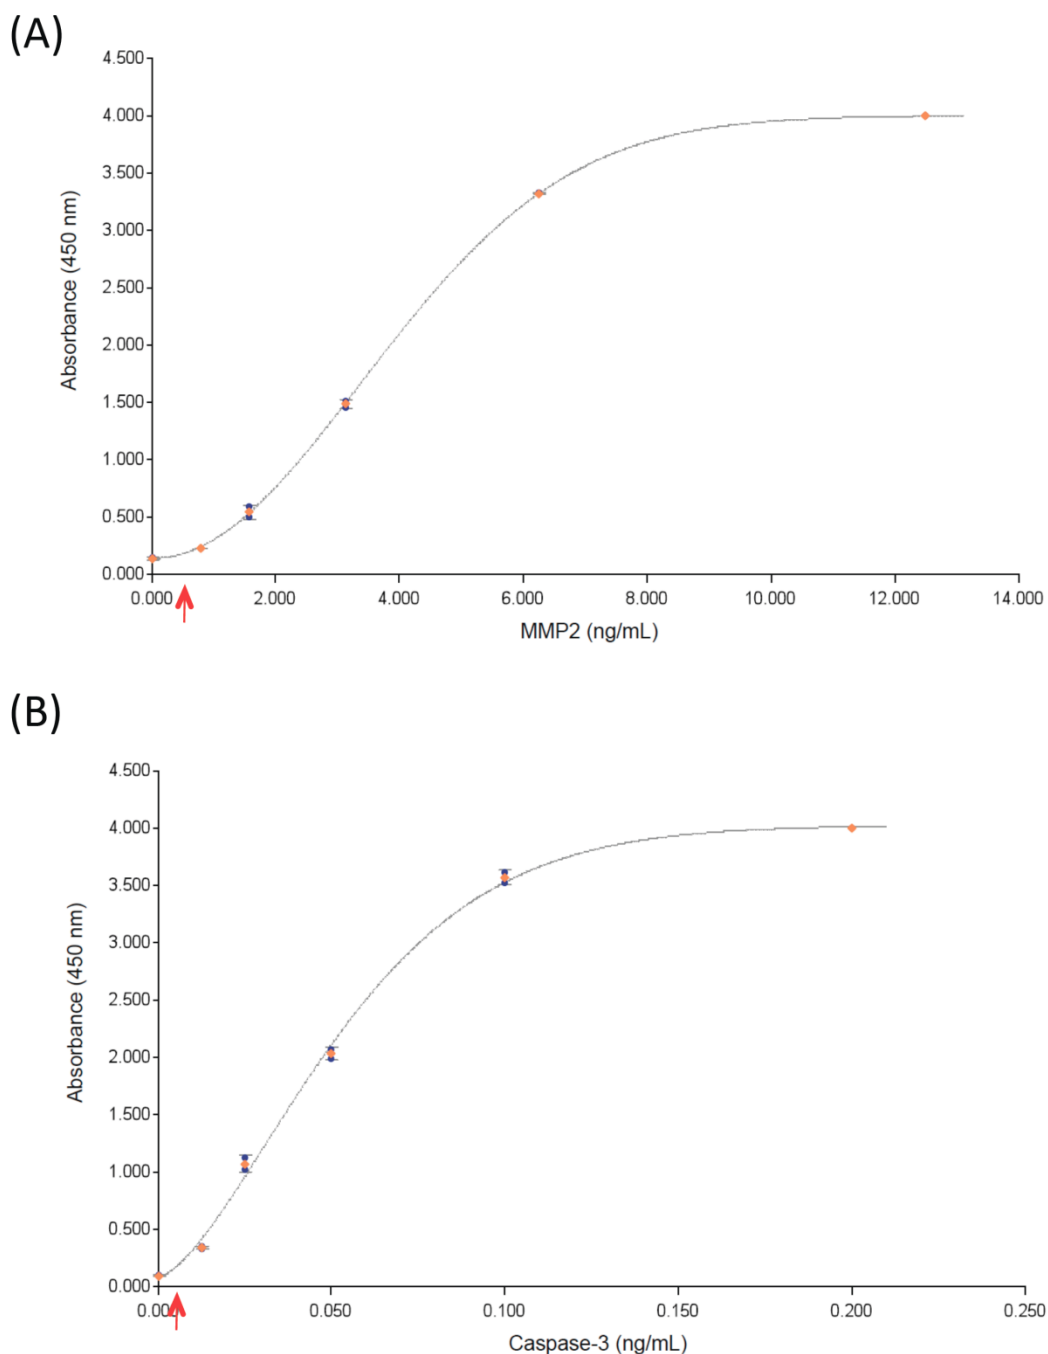

Fig. S2. Standard curves of MMP2 (A) and caspase-3 (B). The data of Fig. 2D at 2 h for MMP2 and Fig. 2E for caspase-3 were fitted with the nonlinear equation of  $\text{Absorbance} = (A-D)/(1+(\text{Concentration of protease}/C)^B)^{E+D}$  using Gen5 (v. 2.00) (BioTek); A, B, C, D, and E are parameters obtained by fitting the ELISA signals to the nonlinear equation. The red arrows indicate the limit of detection (0.5 ng/mL for MMP2 and 3 pg/mL for caspase-3) determined as the concentration of protease that produces an absorbance value equivalent to the average negative value plus  $3 \times$  standard deviation using the standard curve.
